# Supplementary material for: Tunable enzymatically degradable hydrogels for controlled cargo release with dynamic mechanical properties
Source: Royal Society of Chemistry journal article supplement (doi:10.1039/d3sm00475a), 2023-01-01
Supplement: d3sm00475a1.pdf [file d3sm00475a1.pdf]

## Supporting Information

### **Tunable enzymatically degradable hydrogels for controlled cargo release with dynamic mechanical properties**

Riho Tanimoto,<sup>a, b</sup> Mitsuhiro Ebara,<sup>\*a, b, c</sup> and Koichiro Uto<sup>\*a</sup>

- <sup>a</sup> Research Center for Macromolecules and Biomaterials, National Institute for Materials Science (NIMS), Tsukuba, Ibaraki 305-0044, Japan
- <sup>b</sup> Graduate School of Pure and Applied Sciences, University of Tsukuba, 1-1-1 Tennodai, Tsukuba-shi, Ibaraki 305-8571, Japan
- <sup>c</sup> Graduate School of Advanced Engineering, Tokyo University of Science, 6-3-1 Nijjuku, Katsushika-ku, Tokyo 125-8585, Japan

\* Corresponding authors: [UTO.Koichiro@nims.go.jp](mailto:UTO.Koichiro@nims.go.jp) / EBARA. [Mitsuhiro@nims.go.jp](mailto:Mitsuhiro@nims.go.jp)

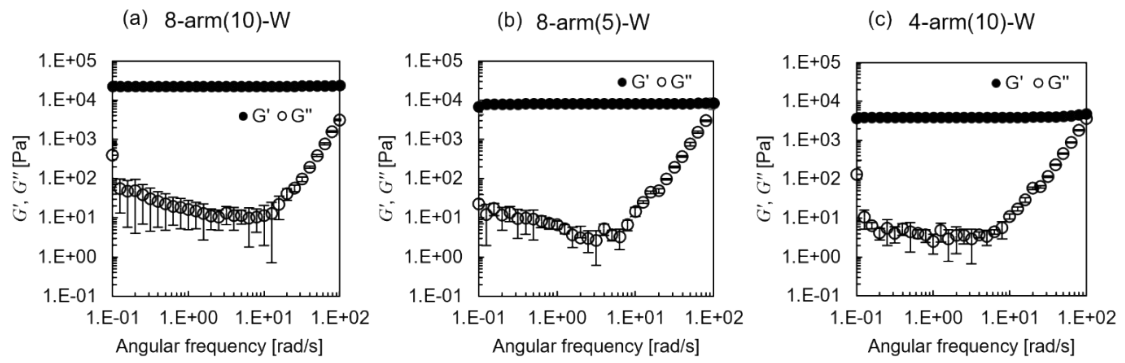

**Figure S1** □ Frequency sweep conducted at 1% strain for swollen gels (before degradation) ( $n=3$ ). Since  $G''$  was negligible relative to  $G'$  in the low frequency region, most of the mechanical structure of the hydrogel is supported by  $G'$ . The value of  $G'$  was almost constant independent of frequency.

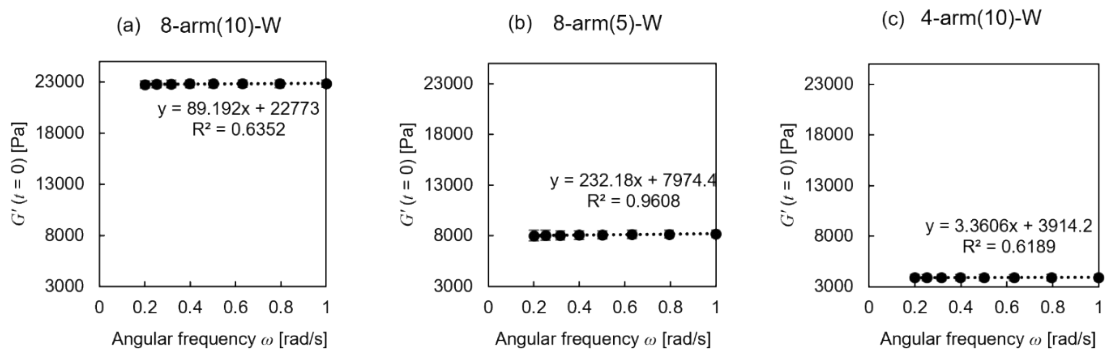

**Figure S2** □ A linear fit of the storage modulus plateau ( $n = 3$ ) was performed for each gel to calculate the zero-frequency storage modulus ( $G'(t = 0, \omega = 0)$ ). The equation from the linear fit is displayed on each graph. The y-intercept from the equation was used as the  $G'(t = 0, \omega = 0)$  to estimate the hydrogel mesh size.

**Table S1** □ Summary of mesh size for swollen initial hydrogels ( $\zeta$ ), and a kinetic constant of hydrogel's enzymatic degradation ( $k^*$ ), and the kinetic constant ( $K_m$ ) and diffusion or release exponent ( $n$ ) of FD released because of hydrogel degradation.

|                                                                      | $\zeta(t=0)$ estimated from $G'(t=0, \omega=0)$ [nm] | $\zeta(t=0)$ estimated from $Q_v$ [nm] | $k^* [M^{-1} \cdot s^{-1}]$ | $K_m(t \geq 0)$ | $n(t \geq 0)$ |
|----------------------------------------------------------------------|------------------------------------------------------|----------------------------------------|-----------------------------|-----------------|---------------|
| 8-arm (10)-W                                                         | 5.73±0.03                                            | 11.27±0.57                             | 1.76±0.14                   | 0.02±0.02       | 1.78±0.18     |
| 8-arm (10)-A                                                         |                                                      | 12.17±0.89                             |                             | 0.13±0.08       | 1.97±0.27     |
| 8-arm (5)-W                                                          | 8.13±0.18                                            | 13.94±0.54                             | 4.04±0.68                   | 0.05±0.02       | 1.67±0.18     |
| 8-arm (5)-A                                                          |                                                      | 14.08±0.14                             |                             | 0.13±0.07       | 2.07±0.16     |
| 4-arm (10)-W                                                         | 10.31±0.25                                           | 17.39±1.20                             | 23.32±3.38                  | 0.77±1.00       | 1.20±0.39     |
| 4-arm (10)-A                                                         | 10.25±0.23                                           | 18.23±0.22                             | 151.71±52.55                | 0.73±0.30       | 1.38±0.16     |
| $2r_H$ (a hydrodynamic diameter of FD ( $M_w = 150k$ ))              | 13.09-21.08                                          | 13.09-21.08                            |                             |                 |               |
| $2r_H$ (a hydrodynamic diameter of collagenase ( $M_r = 70-120 k$ )) | 6.0                                                  | 6.0                                    |                             |                 |               |

(a) 8-arm(5), 0.05  $\mu\text{g/mL}$  collagenase

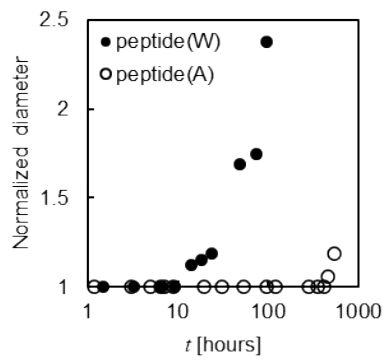

(b) 8-arm(5), 0.5  $\mu\text{g/mL}$  collagenase

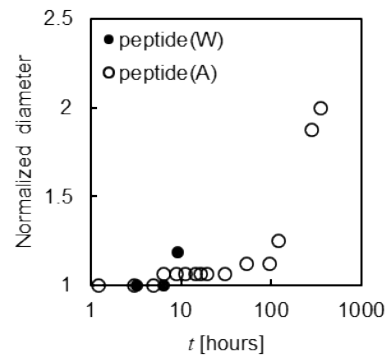

(c) 8-arm(5), 0.05  $\mu\text{g/mL}$  collagenase

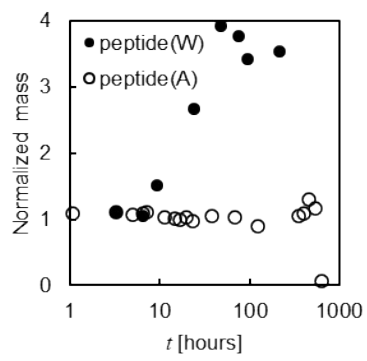

(d) 8-arm(5), 0.5  $\mu\text{g/mL}$  collagenase

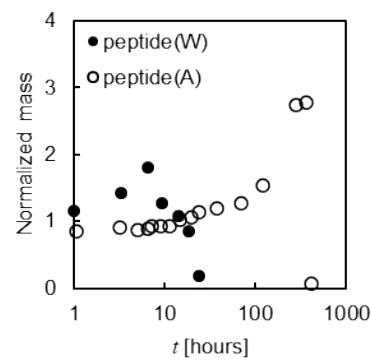

**Figure S3.** (a), (b) Mass change and (c), (d) diameter change of hydrogels in degradation process ( $n = 1$ ).
